# Supplementary material for: Positive Selection and Increased Antiviral Activity Associated with the PARP-Containing Isoform of Human Zinc-Finger Antiviral Protein
Source: PLoS Genet. 2008 Jan 25;4(1):e21. doi: 10.1371/journal.pgen.0040021 (PMC2213710; doi:10.1371/journal.pgen.0040021)
Supplement: Figure S2 — An alignment of the first 230 amino acids of ZAP, corresponding to the CCCH zinc finger motifs, from 14 primates and six non-primate mammals. Residues are highlighted in black or gray to indicate complete conservation or high conservation, respectively. The putative NLS is indicated between residues 69 and 76 and the four CCCH fingers are shown below the alignment. (483 KB PDF) [file pgen.0040021.sg002.pdf]

|                      |                                                              |    |    |    |    |    |    |
|----------------------|--------------------------------------------------------------|----|----|----|----|----|----|
|                      |                                                              | 10 | 20 | 30 | 40 | 50 | 60 |
| Human                | MADPEVCCFITKILCAHGRMALDALLQETALSERPOLCEVLQVAGPDRFVVLTTGGEAGI |    |    |    |    |    |    |
| Chimp                | MADPEVCCFITKILCAHGRMALDALLQETALSERPOLCEVLQVAGPDRFVVLTTGGEAGI |    |    |    |    |    |    |
| Bonobo               | MADPEVCCFITKILCAHGRMALDALLQETALSERPOLCEVLQVAGPDRFVVLTTGGEAGI |    |    |    |    |    |    |
| Gorilla              | MADPEVCCFITKILCAHGRMALDALLQETALSERPOLCEVLQVAGPDRFVVLTTGGEAGI |    |    |    |    |    |    |
| Orangutan            | MADPEVCCFITKILCAHGRMALDALLQETALSERPOLCEVLQVAGPDRFVVLTTGGEAGI |    |    |    |    |    |    |
| Gibboni              | MADPEVCCFITKILCAHGRMALDALLQETALSERPOLCEVLQVAGPDRFVVLTTGGEAGI |    |    |    |    |    |    |
| Patas monkey         | MADPEVCCFITKILCAHGRMALDALLQETALSERPOLCEVLQVAGPDRFVVLTTGGEAGI |    |    |    |    |    |    |
| African green monkey | MADPEVCCFITKILCAHGRMALDALLQETALSERPOLCEVLQVAGPDRFVVLTTGGEAGI |    |    |    |    |    |    |
| Rhesus macaque       | MADPEVCCFITKILCAHGRMALDALLQETALSERPOLCEVLQVAGPDRFVVLTTGGEAGI |    |    |    |    |    |    |
| Titi monkey          | MADPEVCCFITKILCAHGRMALDALLQETALSERPOLCEVLQVAGPDRFVVLTTGGEAGI |    |    |    |    |    |    |
| Tamarin              | MADPEVCCFITKILCAHGRMALDALLQETALSERPOLCEVLQVAGPDRFVVLTTGGEAGI |    |    |    |    |    |    |
| Spider monkey        | MADPEVCCFITKILCAHGRMALDALLQETALSERPOLCEVLQVAGPDRFVVLTTGGEAGI |    |    |    |    |    |    |
| Woolly monkey        | MADPEVCCFITKILCAHGRMALDALLQETALSERPOLCEVLQVAGPDRFVVLTTGGEAGI |    |    |    |    |    |    |
| Galago               | MADPEVCCFITKILCAHGRMALDALLQETALSERPOLCEVLQVAGPDRFVVLTTGGEAGI |    |    |    |    |    |    |
| Rat                  | MADPEVCCFITKILCAHGRMALDALLQETALSERPOLCEVLQVAGPDRFVVLTTGGEAGI |    |    |    |    |    |    |
| Mouse                | MADPEVCCFITKILCAHGRMALDALLQETALSERPOLCEVLQVAGPDRFVVLTTGGEAGI |    |    |    |    |    |    |
| Squirrel             | MADPEVCCFITKILCAHGRMALDALLQETALSERPOLCEVLQVAGPDRFVVLTTGGEAGI |    |    |    |    |    |    |
| Sheep                | MADPEVCCFITKILCAHGRMALDALLQETALSERPOLCEVLQVAGPDRFVVLTTGGEAGI |    |    |    |    |    |    |
| Pig                  | MADPEVCCFITKILCAHGRMALDALLQETALSERPOLCEVLQVAGPDRFVVLTTGGEAGI |    |    |    |    |    |    |
| Dog                  | MADPEVCCFITKILCAHGRMALDALLQETALSERPOLCEVLQVAGPDRFVVLTTGGEAGI |    |    |    |    |    |    |

|                      |                                                               |    |      |    |    |     |     |     |
|----------------------|---------------------------------------------------------------|----|------|----|----|-----|-----|-----|
|                      |                                                               | 70 | NLS. | 80 | 90 | 100 | 110 | 120 |
| Human                | TRSVVATTRARVCRKKYCORPCDNLHLCKLNLGLRCNYSQSERNLCKYSHSEVLSEENFKV |    |      |    |    |     |     |     |
| Chimp                | TRSVVATTRARVCRKKYCORPCDNLHLCKLNLGLRCNYSQSERNLCKYSHSEVLSEENFKV |    |      |    |    |     |     |     |
| Bonobo               | TRSVVATTRARVCRKKYCORPCDNLHLCKLNLGLRCNYSQSERNLCKYSHSEVLSEENFKV |    |      |    |    |     |     |     |
| Gorilla              | TRSVVATTRARVCRKKYCORPCDNLHLCKLNLGLRCNYSQSERNLCKYSHSEVLSEENFKV |    |      |    |    |     |     |     |
| Orangutan            | TRSVVATTRARVCRKKYCORPCDNLHLCKLNLGLRCNYSQSERNLCKYSHSEVLSEENFKV |    |      |    |    |     |     |     |
| Gibboni              | TRSVVATTRARVCRKKYCORPCDNLHLCKLNLGLRCNYSQSERNLCKYSHSEVLSEENFKV |    |      |    |    |     |     |     |
| Patas monkey         | TRSVVATTRARVCRKKYCORPCDNLHLCKLNLGLRCNYSQSERNLCKYSHSEVLSEENFKV |    |      |    |    |     |     |     |
| African green monkey | TRSVVATTRARVCRKKYCORPCDNLHLCKLNLGLRCNYSQSERNLCKYSHSEVLSEENFKV |    |      |    |    |     |     |     |
| Rhesus macaque       | TRSVVATTRARVCRKKYCORPCDNLHLCKLNLGLRCNYSQSERNLCKYSHSEVLSEENFKV |    |      |    |    |     |     |     |
| Titi monkey          | TRSVVATTRARVCRKKYCORPCDNLHLCKLNLGLRCNYSQSERNLCKYSHSEVLSEENFKV |    |      |    |    |     |     |     |
| Tamarin              | TRSVVATTRARVCRKKYCORPCDNLHLCKLNLGLRCNYSQSERNLCKYSHSEVLSEENFKV |    |      |    |    |     |     |     |
| Spider monkey        | TRSVVATTRARVCRKKYCORPCDNLHLCKLNLGLRCNYSQSERNLCKYSHSEVLSEENFKV |    |      |    |    |     |     |     |
| Woolly monkey        | TRSVVATTRARVCRKKYCORPCDNLHLCKLNLGLRCNYSQSERNLCKYSHSEVLSEENFKV |    |      |    |    |     |     |     |
| Galago               | TRSVVATTRARVCRKKYCORPCDNLHLCKLNLGLRCNYSQSERNLCKYSHSEVLSEENFKV |    |      |    |    |     |     |     |
| Rat                  | TRSVVATTRARVCRKKYCORPCDNLHLCKLNLGLRCNYSQSERNLCKYSHSEVLSEENFKV |    |      |    |    |     |     |     |
| Mouse                | TRSVVATTRARVCRKKYCORPCDNLHLCKLNLGLRCNYSQSERNLCKYSHSEVLSEENFKV |    |      |    |    |     |     |     |
| Squirrel             | TRSVVATTRARVCRKKYCORPCDNLHLCKLNLGLRCNYSQSERNLCKYSHSEVLSEENFKV |    |      |    |    |     |     |     |
| Sheep                | TRSVVATTRARVCRKKYCORPCDNLHLCKLNLGLRCNYSQSERNLCKYSHSEVLSEENFKV |    |      |    |    |     |     |     |
| Pig                  | TRSVVATTRARVCRKKYCORPCDNLHLCKLNLGLRCNYSQSERNLCKYSHSEVLSEENFKV |    |      |    |    |     |     |     |
| Dog                  | TRSVVATTRARVCRKKYCORPCDNLHLCKLNLGLRCNYSQSERNLCKYSHSEVLSEENFKV |    |      |    |    |     |     |     |

|                      |                                                      |     |     |     |     |     |     |
|----------------------|------------------------------------------------------|-----|-----|-----|-----|-----|-----|
|                      |                                                      | 130 | 140 | 150 | 160 | 170 | 180 |
| Human                | LKNHELSGLNKEELAVLLVQSDPFFMPEICKSYKGEGRQOICNQPPCSRLHI |     |     |     |     |     |     |
| Chimp                | LKNHELSGLNKEELAVLLVQSDPFFMPEICKSYKGEGRQOICNQPPCSRLHI |     |     |     |     |     |     |
| Bonobo               | LKNHELSGLNKEELAVLLVQSDPFFMPEICKSYKGEGRQOICNQPPCSRLHI |     |     |     |     |     |     |
| Gorilla              | LKNHELSGLNKEELAVLLVQSDPFFMPEICKSYKGEGRQOICNQPPCSRLHI |     |     |     |     |     |     |
| Orangutan            | LKNHELSGLNKEELAVLLVQSDPFFMPEICKSYKGEGRQOICNQPPCSRLHI |     |     |     |     |     |     |
| Gibboni              | LKNHELSGLNKEELAVLLVQSDPFFMPEICKSYKGEGRQOICNQPPCSRLHI |     |     |     |     |     |     |
| Patas monkey         | LKNHELSGLNKEELAVLLVQSDPFFMPEICKSYKGEGRQOICNQPPCSRLHI |     |     |     |     |     |     |
| African green monkey | LKNHELSGLNKEELAVLLVQSDPFFMPEICKSYKGEGRQOICNQPPCSRLHI |     |     |     |     |     |     |
| Rhesus macaque       | LKNHELSGLNKEELAVLLVQSDPFFMPEICKSYKGEGRQOICNQPPCSRLHI |     |     |     |     |     |     |
| Titi monkey          | LKNHELSGLNKEELAVLLVQSDPFFMPEICKSYKGEGRQOICNQPPCSRLHI |     |     |     |     |     |     |
| Tamarin              | LKNHELSGLNKEELAVLLVQSDPFFMPEICKSYKGEGRQOICNQPPCSRLHI |     |     |     |     |     |     |
| Spider monkey        | LKNHELSGLNKEELAVLLVQSDPFFMPEICKSYKGEGRQOICNQPPCSRLHI |     |     |     |     |     |     |
| Woolly monkey        | LKNHELSGLNKEELAVLLVQSDPFFMPEICKSYKGEGRQOICNQPPCSRLHI |     |     |     |     |     |     |
| Galago               | LKNHELSGLNKEELAVLLVQSDPFFMPEICKSYKGEGRQOICNQPPCSRLHI |     |     |     |     |     |     |
| Rat                  | LKNHELSGLNKEELAVLLVQSDPFFMPEICKSYKGEGRQOICNQPPCSRLHI |     |     |     |     |     |     |
| Mouse                | LKNHELSGLNKEELAVLLVQSDPFFMPEICKSYKGEGRQOICNQPPCSRLHI |     |     |     |     |     |     |
| Squirrel             | LKNHELSGLNKEELAVLLVQSDPFFMPEICKSYKGEGRQOICNQPPCSRLHI |     |     |     |     |     |     |
| Sheep                | LKNHELSGLNKEELAVLLVQSDPFFMPEICKSYKGEGRQOICNQPPCSRLHI |     |     |     |     |     |     |
| Pig                  | LKNHELSGLNKEELAVLLVQSDPFFMPEICKSYKGEGRQOICNQPPCSRLHI |     |     |     |     |     |     |
| Dog                  | LKNHELSGLNKEELAVLLVQSDPFFMPEICKSYKGEGRQOICNQPPCSRLHI |     |     |     |     |     |     |

|                      |                                        |     |     |     |     |     |
|----------------------|----------------------------------------|-----|-----|-----|-----|-----|
|                      |                                        | 190 | 200 | 210 | 220 | 230 |
| Human                | NCRFPNCIRSHNLMDRKVLAIMREHGLNPDVVQNIQDI |     |     |     |     |     |
| Chimp                | NCRFPNCIRSHNLMDRKVLAIMREHGLNPDVVQNIQDI |     |     |     |     |     |
| Bonobo               | NCRFPNCIRSHNLMDRKVLAIMREHGLNPDVVQNIQDI |     |     |     |     |     |
| Gorilla              | NCRFPNCIRSHNLMDRKVLAIMREHGLNPDVVQNIQDI |     |     |     |     |     |
| Orangutan            | NCRFPNCIRSHNLMDRKVLAIMREHGLNPDVVQNIQDI |     |     |     |     |     |
| Gibboni              | NCRFPNCIRSHNLMDRKVLAIMREHGLNPDVVQNIQDI |     |     |     |     |     |
| Patas monkey         | NCRFPNCIRSHNLMDRKVLAIMREHGLNPDVVQNIQDI |     |     |     |     |     |
| African green monkey | NCRFPNCIRSHNLMDRKVLAIMREHGLNPDVVQNIQDI |     |     |     |     |     |
| Rhesus macaque       | NCRFPNCIRSHNLMDRKVLAIMREHGLNPDVVQNIQDI |     |     |     |     |     |
| Titi monkey          | NCRFPNCIRSHNLMDRKVLAIMREHGLNPDVVQNIQDI |     |     |     |     |     |
| Tamarin              | NCRFPNCIRSHNLMDRKVLAIMREHGLNPDVVQNIQDI |     |     |     |     |     |
| Spider monkey        | NCRFPNCIRSHNLMDRKVLAIMREHGLNPDVVQNIQDI |     |     |     |     |     |
| Woolly monkey        | NCRFPNCIRSHNLMDRKVLAIMREHGLNPDVVQNIQDI |     |     |     |     |     |
| Galago               | NCRFPNCIRSHNLMDRKVLAIMREHGLNPDVVQNIQDI |     |     |     |     |     |
| Rat                  | NCRFPNCIRSHNLMDRKVLAIMREHGLNPDVVQNIQDI |     |     |     |     |     |
| Mouse                | NCRFPNCIRSHNLMDRKVLAIMREHGLNPDVVQNIQDI |     |     |     |     |     |
| Squirrel             | NCRFPNCIRSHNLMDRKVLAIMREHGLNPDVVQNIQDI |     |     |     |     |     |
| Sheep                | NCRFPNCIRSHNLMDRKVLAIMREHGLNPDVVQNIQDI |     |     |     |     |     |
| Pig                  | NCRFPNCIRSHNLMDRKVLAIMREHGLNPDVVQNIQDI |     |     |     |     |     |
| Dog                  | NCRFPNCIRSHNLMDRKVLAIMREHGLNPDVVQNIQDI |     |     |     |     |     |

Kerns et al Supplementary Figure 2
