# Supplementary material for: Positive Selection and Increased Antiviral Activity Associated with the PARP-Containing Isoform of Human Zinc-Finger Antiviral Protein
Source: PubMed Central journal article supplement (PMC2213710; doi:10.1371/journal.pgen.0040021), 2008-01-25
Supplement: pgen.0040021.sg003.pdf [file pgen.0040021.sg003.pdf]

**A**

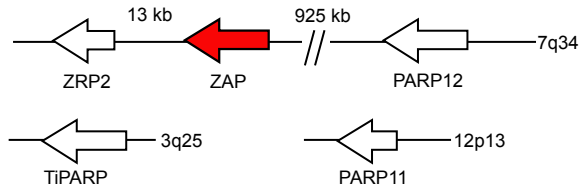

**B**

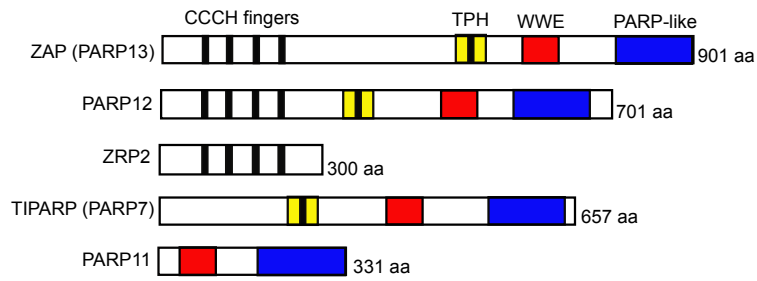

**Kerns et al Supplementary Figure 3**
